# Supplementary material
Source: publisher figshare collection journal article supplement (https://gsapubs.figshare.com/articles/dataset/_/12541463)
Supplement: Supplementary file 1 [file 1]

Huang, H., He, D., Li, D., and Li, Y., 2019, Detrital zircon U-Pb ages of Paleogene deposits in the southwestern Sichuan foreland basin, China: Constraints on basin-mountain evolution along the southeastern margin of the Tibetan Plateau: GSA Bulletin, <https://doi.org/10.1130/B35211.1>.

## **Data Repository**

Table DR1. detrital components of sandstones from the Paleogene.

Table DR2. U-Pb isotopic ratios and ages of detrital zircons from the Paleogene Liujia formation.

Table DR3. U-Pb isotopic ratios and ages of detrital zircons from the Paleogene Mingshan formation.

Table DR4. U-Pb isotopic ratios and ages of detrital zircons from the Paleogene Lushan formation.

TABLE DR1. DETRITAL COMPONENTS OF SANDSTONES FROM THE PALEOGENE IN THE  
SOUTHWESTERN SICHUAN BASIN

| Formation | Sample | Qm* | Qpq* | Cht* | P* | K* | Lv* | Ls* | Lm* |
|-----------|--------|-----|------|------|----|----|-----|-----|-----|
| Liujia    | CXN089 | 286 | 20   | 3    | 6  | 0  | 0   | 0   | 44  |
| Mingshan  | CXN134 | 277 | 15   | 0    | 22 | 0  | 0   | 45  | 6   |
| Lushan    | CXN168 | 277 | 14   | 3    | 0  | 0  | 0   | 90  | 112 |

Qm: monocrystalline quartz;  
Qpq: polycrystalline quartz(not including chert);  
Cht: chert;  
P: plagioclase feldspar;  
K: potassium feldspar;  
Lv: volcanic lithic grains  
Ls: sedimentary lithic grains;  
Lm: metavolcanic lithic grains.
